# Supplementary material for: Muscle Synergies and Clinical Outcome Measures Describe Different Factors of Upper Limb Motor Function in Stroke Survivors Undergoing Rehabilitation in a Virtual Reality Environment
Source: MDPI journal article supplement (doi:10.3390/s21238002), 2021-11-30
Supplement: s1 [file s1]

## Article

# Muscle Synergies and Clinical Outcome Measures Describe Different Factors of Upper Limb Motor Function in Stroke Survivors Undergoing Rehabilitation in a Virtual Reality Environment

Lorenza Maistrello <sup>1</sup>, Daniele Rimini <sup>2,\*</sup>, Vincent C.K. Cheung <sup>3</sup>, Giorgia Pregnolato <sup>1</sup> and Andrea Turolla <sup>1</sup>

<sup>1</sup> Laboratory of Rehabilitation Technologies, IRCCS San Camillo Hospital, 30126, Venice, Italy; [lorenza.maistrello@hsancamillo.it](mailto:lorenza.maistrello@hsancamillo.it) (L.M.); [giorgia.pregnolato@hsancamillo.it](mailto:giorgia.pregnolato@hsancamillo.it) (G.P.); [andrea.turolla@hsancamillo.it](mailto:andrea.turolla@hsancamillo.it) (A.T.)

<sup>2</sup> Medical Physics Department - Clinical Engineering, Salford Care Organisation, Salford, M6 8HD, United Kingdom; [daniele.rimini@nca.nhs.uk](mailto:daniele.rimini@nca.nhs.uk) (D.R.)

<sup>3</sup> School of Biomedical Sciences, The Chinese University of Hong Kong, Hong Kong, China; [yckc@cuhk.edu.hk](mailto:yckc@cuhk.edu.hk) (V.C.K.C.)

\* Correspondence: [daniele.rimini@nca.nhs.uk](mailto:daniele.rimini@nca.nhs.uk); Tel.: +44 61620(64859)

**Citation:** Maistrello, L.; Rimini, D.; Cheung, V.C.K.; Pregnolato, G. Turolla, A.; Muscle Synergies and Clinical Outcome Measures Describe Different Factors of Upper Limb Motor Function in Stroke Survivors Undergoing Rehabilitation in a Virtual Reality Environment. *Sensors* **2021**, *21*, 8002. <https://doi.org/10.3390/s21238002>

Academic Editor: Francesco Di Nardo, Valentina Agostini and Silvia Conforto

Received: 30 October 2021  
Accepted: 26 November 2021  
Published: date

**Publisher's Note:** MDPI stays neutral with regard to jurisdictional claims in published maps and institutional affiliations.

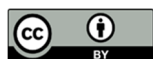

**Copyright:** © 2021 by the authors. Submitted for possible open access publication under the terms and conditions of the Creative Commons Attribution (CC BY) license (<https://creativecommons.org/licenses/by/4.0/>).

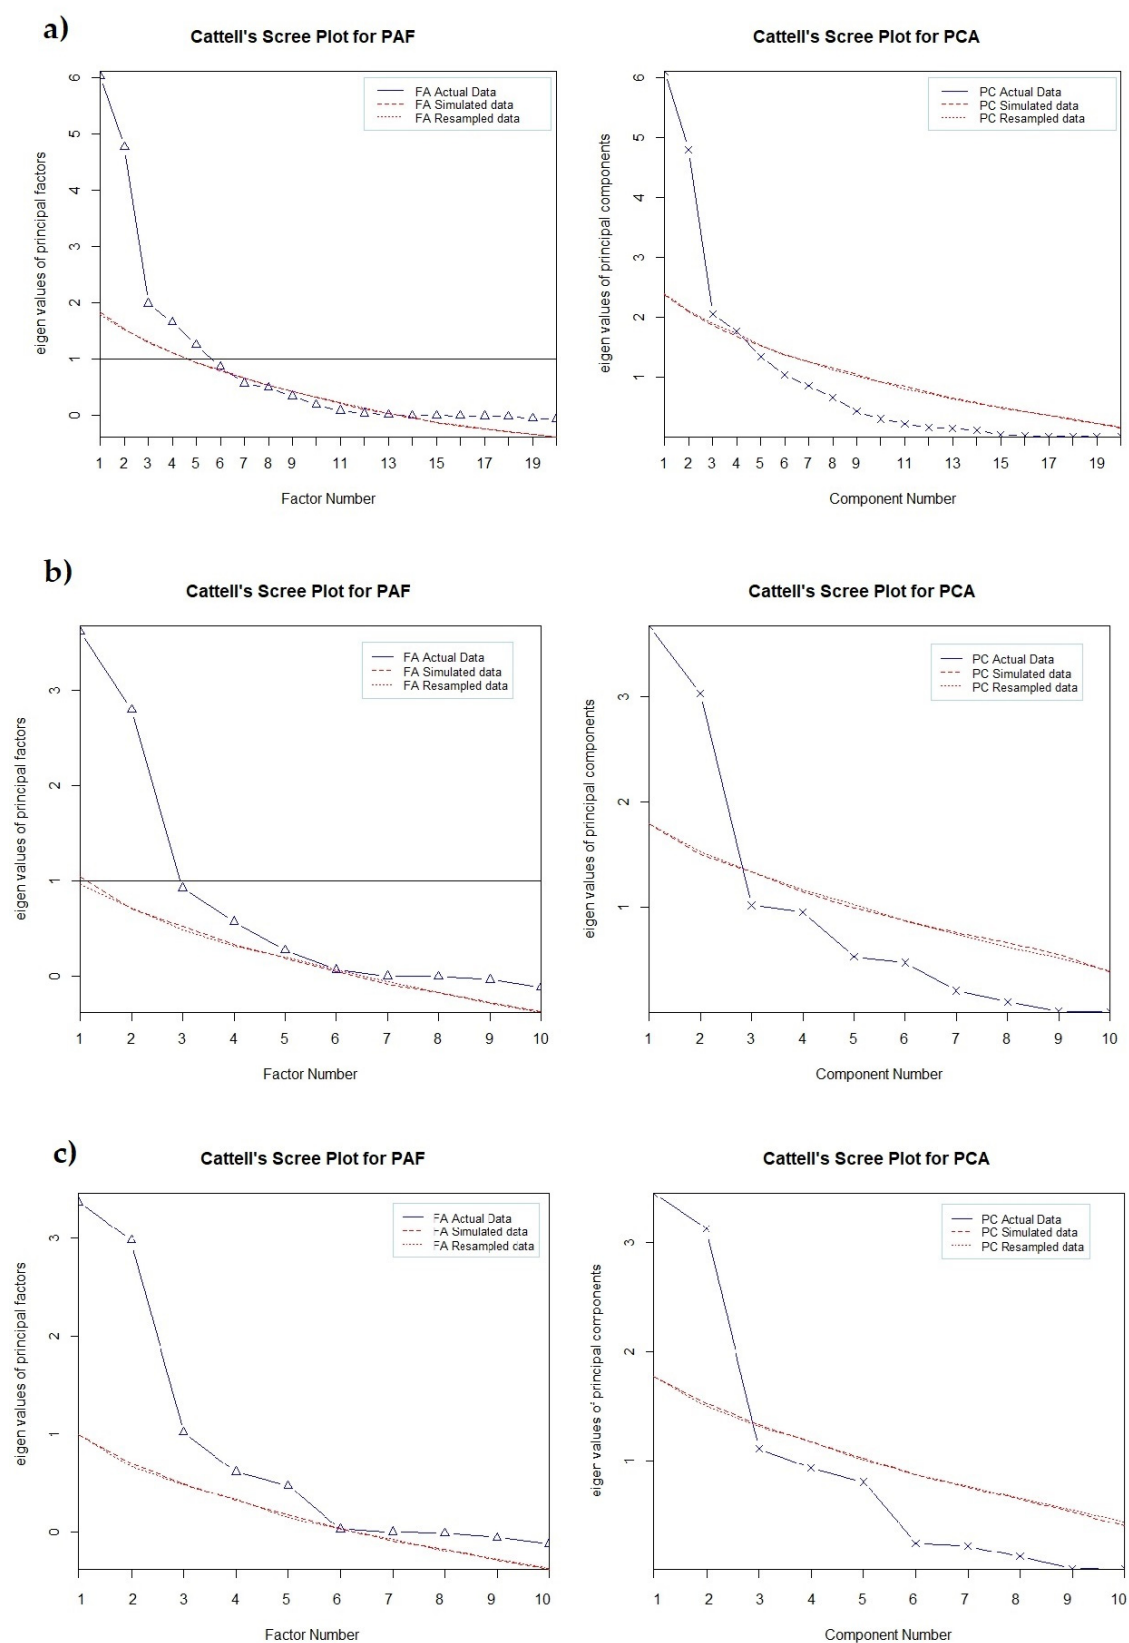

**Figure S1.** Cattell's scree plot based on both PAF and PCA for EFA-All (a), EFA0 (b) and EFA1 (c). Cattell's rule states that number of factors and components, corresponding to eigenvalues to the up of the straight line should be retained. Abbreviations: FA = Factor Analysis; PC = Principal Component.
